# Supplementary material for: Hepatic Resection Following Selective Internal Radiation Therapy for Colorectal Cancer Metastases in the FOXFIRE Clinical Trial: Clinical Outcomes and Distribution of Microspheres
Source: PubMed Central journal article supplement (PMC6721483; doi:10.3390/cancers11081155), 2019-08-12

## Supplementary Materials: Hepatic Resection Following Selective Internal Radiation Therapy for Colorectal Cancer Metastases in the FOXFIRE Clinical Trial: Clinical Outcomes and Distribution of Microspheres

Helen Winter, Joseph Rassam, Pradeep S. Virdee, Rob Goldin, Priyanka Pitcheshwar, Klara Weaver, John Primrose, David P. Berry, Harpreet S. Wasan and Ricky A. Sharma

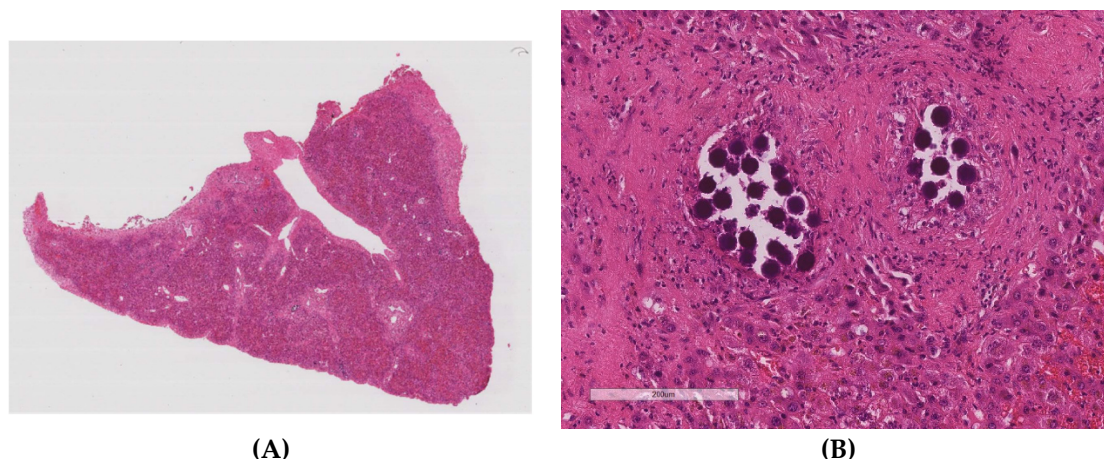

**Figure S1.** (A) Low power view of liver, with microspheres taken from a digitised image (Haematoxylin and Eosin stained section, original magnification  $\times 20$ ). (B) High power view of microspheres taken from the same digitised image as the previous slide (Haematoxylin and Eosin stained section, original magnification  $\times 400$ ).

**Table S1.** Microsphere densities and distribution demonstrated on zonal analysis. Spheres/mm<sup>2</sup> in 0-1mm and 1-2mm zones away from tumour border, 0-1mm and 1-2mm zones within tumour border, non-neoplastic tissue and tumour centre. Tumour centre was defined as area proximal to 2mm within tumour border. n/a = tissue not available.

| Cases   | Spheres/mm <sup>2</sup> 1-2 mm zone away from tumour | Spheres/mm <sup>2</sup> 0-1 mm zone away from tumour | Spheres/mm <sup>2</sup> 0-1 mm zone into tumour | Spheres/mm <sup>2</sup> 1-2 mm zone into tumour | Spheres/mm <sup>2</sup> Non-neoplastic tissue | Spheres/mm <sup>2</sup> Tumour centre |
|---------|------------------------------------------------------|------------------------------------------------------|-------------------------------------------------|-------------------------------------------------|-----------------------------------------------|---------------------------------------|
| Case 1  | 1.25                                                 | 2.96                                                 | 3.33                                            | 0.48                                            | 0.57                                          | 1.49                                  |
| Case 2  | 0.95                                                 | 3.19                                                 | 15.94                                           | 0.88                                            | 0.25                                          | 1.23                                  |
| Case 3  | 1.51                                                 | 3.47                                                 | 12.6                                            | 8.87                                            | 0.55                                          | 1.69                                  |
| Case 4  | 1.58                                                 | 2.26                                                 | 2.16                                            | 3.21                                            | 0                                             | 1.32                                  |
| Case 5  | 1.01                                                 | 1.95                                                 | 3.72                                            | 0.72                                            | 4.09                                          | 0                                     |
| Case 6  | 2                                                    | 2.31                                                 | 2.38                                            | 2.01                                            | 0.74                                          | 1.53                                  |
| Case 7  | 1.87                                                 | 3.61                                                 | 24.72                                           | 18.74                                           | 0                                             | 2.5                                   |
| Case 8  | 1.12                                                 | 2.1                                                  | 2.07                                            | 0.25                                            | 0.18                                          | 0.33                                  |
| Case 9  | 0                                                    | 0.09                                                 | 0.13                                            | 0                                               | 0.11                                          | n/a                                   |
| Case 10 | 0                                                    | 0                                                    | 0.05                                            | 0                                               | 0                                             | 0.22                                  |
| Case 11 | 0                                                    | 0                                                    | 0                                               | 0.14                                            | n/a                                           | 0.16                                  |
| Median  | 1.12                                                 | 2.26                                                 | 2.38                                            | 0.72                                            | 0.215                                         | 1.28                                  |
| IQR     | 1.58                                                 | 3.1                                                  | 12.47                                           | 3.07                                            | 0.57                                          | 1.31                                  |

**Table S2.** Histological findings in tumour and non-neoplastic liver tissue in individual cases receiving chemotherapy-alone or chemotherapy plus SIRT. Abbreviation used: n/a= tissue not available.

| Case Number               | Tumour Tissue |          |          |                                             | Non-Neoplastic Tissue Properties |                    |                                        |           |
|---------------------------|---------------|----------|----------|---------------------------------------------|----------------------------------|--------------------|----------------------------------------|-----------|
|                           | Viable Tumour | Necrosis | Fibrosis | Inflammation/<br>Macrophage<br>Infiltration | Other<br>Properties              | Vascular<br>Change | Nodular<br>Regenerative<br>Hyperplasia | Steatosis |
| <b>Chemo + SIRT cases</b> |               |          |          |                                             |                                  |                    |                                        |           |
| Case 1                    | 0%            | 20%      | 60%      | 20%                                         | No                               | Moderate           | Yes                                    | No        |
| Case 2                    | 0%            | 0%       | 90%      | 10%                                         | Evidence of calcification        | Mild               | No                                     | No        |
| Case 3                    | 0%            | 50%      | 20%      | 0%                                          | 30% Mucinous                     | Moderate           | Yes                                    | No        |
| Case 4                    | 0%            | 0%       | 70%      | 20%                                         | 10% Mucinous                     | Severe             | No                                     | No        |
| Case 5                    | 0%            | 0%       | 80%      | 20%                                         | No                               | Severe             | No                                     | No        |
| Case 6                    | 10%           | 0%       | 70%      | 20%                                         | No                               | n/a                | n/a                                    | n/a       |
| Case 7                    | 0%            | 0%       | 50%      | 50%                                         | No                               | Mild               | No                                     | No        |
| Case 8                    | 10%           | 0%       | 20%      | 0%                                          | 70% Mucinous                     | Moderate           | No                                     | No        |
| Case 9                    | 80%           | 10%      | 10%      | 0%                                          | No                               | Mild               | No                                     | Mild      |
| Case 10                   | 50%           | 5%       | 35%      | 5%                                          | No                               | Mild               | No                                     | No        |
| Case 11                   | 50%           | 50%      | 0%       | 0%                                          | No                               | n/a                | n/a                                    | n/a       |
| <b>Chemo alone cases</b>  |               |          |          |                                             |                                  |                    |                                        |           |
| Case 12                   | n/a           | n/a      | n/a      | n/a                                         | n/a                              | Mild               | Yes                                    | No        |
| Case 13                   | 80%           | 10%      | 10%      | 0%                                          | No                               | Mild               | Yes                                    | No        |
| Case 14                   | 50%           | 30%      | 20%      | 0%                                          | No                               | Moderate           | No                                     | No        |
| Case 15                   | 10%           | 75%      | 5%       | 10%                                         | No                               | n/a                | n/a                                    | n/a       |
| Case 16                   | 80%           | 0%       | 0%       | 20%                                         | No                               | Mild               | No                                     | No        |
| Case 17                   | n/a           | n/a      | n/a      | n/a                                         | n/a                              | Moderate           | Yes                                    | No        |
| Case 18                   | 85%           | 0%       | 15%      | 0%                                          | No                               | Moderate           | No                                     | No        |
| Case 19                   | 60%           | 30%      | 10%      | 0%                                          | No                               | Moderate           | No                                     | No        |
| Case 20                   | 60%           | 40%      | 0%       | 0%                                          | No                               | Moderate           | No                                     | No        |
| Case 21                   | 0%            | 100%     | 0%       | 0%                                          | No                               | Mild               | No                                     | No        |
| Case 22                   | 10%           | 50%      | 40%      | 0%                                          | No                               | Mild               | No                                     | Mild      |
| Case 23                   | n/a           | n/a      | n/a      | n/a                                         | n/a                              | Mild               | No                                     | Mild      |
| Case 24                   | 20%           | 60%      | 10%      | 0%                                          | No                               | Moderate           | No                                     | No        |
| Case 25                   | 60%           | 20%      | 20%      | 0%                                          | No                               | Moderate           | No                                     | Mild      |
| Case 26                   | 0%            | 30%      | 40%      | 0%                                          | 30% Mucinous                     | Moderate           | No                                     | No        |
| Case 27                   | 20%           | 0%       | 60%      | 20%                                         | No                               | Moderate           | Yes                                    | No        |

**Table S3.** Histological effects seen in hepatic resection specimens after chemotherapy. Abbreviations used: FOLFOX: fluorouracil/leucovorin, oxaliplatin; FOLFIRI: fluorouracil/leucovorin, irinotecan; FOLFOXIRI: fluorouracil/leucovorin, oxaliplatin and irinotecan; 5-FU: 5-fluorouracil; LV: leucovorin; HAI: hepatic arterial infusion; NASH: non-alcoholic steato-hepatitis; SOS: sinusoidal obstruction syndrome.

| Author                           | Prospective or Retrospective | Number of Patients             | Systemic Therapy                 | Histological Effects                                                                           | Observations                                                                               |
|----------------------------------|------------------------------|--------------------------------|----------------------------------|------------------------------------------------------------------------------------------------|--------------------------------------------------------------------------------------------|
| (Rubbia-Brandt et al., 2004) [1] | Retrospective                | 153                            | FOLFOX, 5-FU, FOLFIRI, FOLFOXIRI | 51% sinusoidal dilatation and haemorrhage 78% receiving oxaliplatin had sinusoidal alterations | Sinusoidal obstruction particularly related to oxaliplatin                                 |
| (Vauthey et al., 2006) [2]       | Retrospective                | 406: 158 no chemo vs 248 chemo | FOLFIRI, FOLFOX, 5-FU, other     | 9% steatosis; 8% steatohepatitis; 5% sinusoidal dilation                                       | Irinotecan associated with steatohepatitis, associated with increased mortality at 90 days |

|                            |               |                                                                                      |                                   |                                                                                                                                                           |                                                                                                    |
|----------------------------|---------------|--------------------------------------------------------------------------------------|-----------------------------------|-----------------------------------------------------------------------------------------------------------------------------------------------------------|----------------------------------------------------------------------------------------------------|
| (Aloia et al., 2006) [3]   | Retrospective | 92, 17 no chemo vs 75 chemo                                                          | FOLFOX, 5-FU/LV                   | 52% chemo had vascular lesions vs 18% with no chemo                                                                                                       | Main lesions from FOLFOX vascular Risk of complications related to duration of pre-operative chemo |
| (Fernandez et al.)2005 [4] | Prospective   | 37: 13 no chemo; 10 5FU; 14 irinotecan or oxaliplatin (4 both)                       | 5-FU; FOLFOX; FOLFIRI; FOLFOXIRI  |                                                                                                                                                           | Graded for NASH & by liver injury score.                                                           |
| (Vreuls et al., 2016) [5]  | Retrospective | 30 resections; 28 had neoadjuvant oxaliplatin                                        | oxaliplatin based chemotherapy    | Showed detachment of the sinusoidal endothelial cell lining and an enlarged space of Disse.                                                               | Eighteen (64%) of the 28 patients showed SOS lesions, based on microscopy.                         |
| (Lu et al., 2013) [6]      | Retrospective | 106: 53 no chemotherapy; 42 neoadjuvant oxaliplatin (few had irinotecan); 11 had HAI | oxaliplatin 31% (& irinotecan 9%) | 16 patients (15%) had steatosis, 31 29% had sinusoidal dilation and 19% had steatohepatitis. HAI more steatosis, sinusoidal dilation and steatohepatitis. | Oxaliplatin associated with sinusoidal dilation.                                                   |

**Table S4.** Histological changes observed in hepatic resection specimens from patients having SIRT prior to resection. HCC: hepatocellular carcinoma. CRCLM: colorectal cancer liver metastases.

| Publication                       | N  | Diagnosis        | Background Liver                                                          | Tumour Effects                                                                                                                                                                                      | Microsphere Distribution                                                     | Observations                                                                                                                                                                                                                                                                                                                                                       | Gallbladder Involvement                                         |
|-----------------------------------|----|------------------|---------------------------------------------------------------------------|-----------------------------------------------------------------------------------------------------------------------------------------------------------------------------------------------------|------------------------------------------------------------------------------|--------------------------------------------------------------------------------------------------------------------------------------------------------------------------------------------------------------------------------------------------------------------------------------------------------------------------------------------------------------------|-----------------------------------------------------------------|
| (Kennedy, A. S. et al., 2004) [7] | 4  | 2 HCC<br>2 CRCLM | Little radiation effect on normal liver parenchyma, distant to tumour     | The two patients with CRCLM showed 90% necrosis in all tumour nodules                                                                                                                               | Periphery of tumour (more than centre or background normal liver parenchyma) | Come centrilobular necrosis. Mild steatosis and the endothelium showed features of injury. Giant cell reaction or histiocytes Stromal fibrinous exudate with fibroblasts and delicate collagen strands, within the tumour bed. Minimal cellular inflammatory response; this observation is supportive of direct radiation injury as a non-immune mediated process. | Two cases of cholecystitis – one with microspheres in submucosa |
| (Wang et al., 2013) [8]           | 3  | CRCLM            | Sinusoidal dilatation / tumour mass effect in adjacent liver              | In five tumours, range of response from complete to minimal response on pathological assessment. Tumour necrosis, mucinous alteration, aggregates of foamy histiocytes, calcification and fibrosis. | Vascular tumour bed Vessels of portal tracts of background liver             |                                                                                                                                                                                                                                                                                                                                                                    | Bile ductular reaction adjacent to tumour                       |
| (Justinger et al., 2015) [9]      | 13 | CRC              | Portal fibrosis in normal liver parenchyma adjacent to tumour at 10 weeks | Tumour regression with central scarring                                                                                                                                                             | Resin microspheres within vascular tumour bed.                               | Microspheres present in portal tract vessels in background liver                                                                                                                                                                                                                                                                                                   | Not reported                                                    |

|                            |   |     |                                                       |                                                                                                                                                     |                                          |              |              |
|----------------------------|---|-----|-------------------------------------------------------|-----------------------------------------------------------------------------------------------------------------------------------------------------|------------------------------------------|--------------|--------------|
| (Hadaki et al., 2011) [10] | 1 | CRC | Microspheres trapped within the background parenchyma | Two discrete areas of fibrosis with a small amount of extracellular mucin, but no epithelial component confirming complete pathological resolution. | Trapped within the background parenchyma | Not reported | Not reported |
|----------------------------|---|-----|-------------------------------------------------------|-----------------------------------------------------------------------------------------------------------------------------------------------------|------------------------------------------|--------------|--------------|

## References

- Rubbia-Brandt, L.; Audard, V.; Sartoretti, P.; Roth, A.D.; Brezault, C.; Le Charpentier, M.; Dousset, B.; Morel, P.; Soubrane, O.; Chaussade, S., et al. Severe hepatic sinusoidal obstruction associated with oxaliplatin-based chemotherapy in patients with metastatic colorectal cancer. *Ann. Oncol.* **2004**, *15*, 460–466, doi:10.1093/annonc/mdh095.
- Vauthey, J.N.; Pawlik, T.M.; Ribero, D.; Wu, T.T.; Zorzi, D.; Hoff, P.M.; Xiong, H.Q.; Eng, C.; Lauwers, G.Y.; Mino-Kenudson, M., et al. Chemotherapy regimen predicts steatohepatitis and an increase in 90-day mortality after surgery for hepatic colorectal metastases. *J. Clin. Oncol.* **2006**, *24*, 2065–2072, doi:10.1200/JCO.2005.05.3074.
- Aloia, T.; Sebagh, M.; Plasse, M.; Karam, V.; Levi, F.; Giacchetti, S.; Azoulay, D.; Bismuth, H.; Castaing, D.; Adam, R. Liver histology and surgical outcomes after preoperative chemotherapy with fluorouracil plus oxaliplatin in colorectal cancer liver metastases. *J. Clin. Oncol.* **2006**, *24*, 4983–4990, doi:10.1200/JCO.2006.05.8156.
- Fernandez, F.G.; Ritter, J.; Goodwin, J.W.; Linehan, D.C.; Hawkins, W.G.; Strasberg, S.M. Effect of steatohepatitis associated with irinotecan or oxaliplatin pretreatment on resectability of hepatic colorectal metastases. *J. Am. Coll. Surg.* **2005**, *200*, 845–853, doi:10.1016/j.jamcollsurg.2005.01.024.
- Vreuls, C.P.; Driessen, A.; Olde Damink, S.W.; Koek, G.H.; Duimel, H.; van den Broek, M.A.; Dejong, C.H.; Braet, F.; Wisse, E. Sinusoidal obstruction syndrome (SOS): A light and electron microscopy study in human liver. *Micron* **2016**, *84*, 17–22, doi:10.1016/j.micron.2016.02.006.
- Lu, Q.Y.; Zhao, A.L.; Deng, W.; Li, Z.W.; Shen, L. Hepatic histopathology and postoperative outcome after preoperative chemotherapy for Chinese patients with colorectal liver metastases. *World J. Gastrointest Surg.* **2013**, *5*, 30–36, doi:10.4240/wjgs.v5.i3.30.
- Kennedy, A.S.; Nutting, C.; Coldwell, D.; Gaiser, J.; Drachenberg, C. Pathologic response and microdosimetry of (90)Y microspheres in man: review of four explanted whole livers. *Int. J. Radiat. Oncol. Biol. Phys.* **2004**, *60*, 1552–1563, doi:10.1016/j.ijrobp.2004.09.004.
- Wang, L.M.; Jani, A.R.; Hill, E.J.; Sharma, R.A. Anatomical basis and histopathological changes resulting from selective internal radiotherapy for liver metastases. *J. Clin. Pathol.* **2013**, *66*, 205–211, doi:10.1136/jclinpath-2012-201231.
- Justinger, C.; Kouladouros, K.; Gartner, D.; Tatsch, K.; Reimer, P.; Rudiger, T.; Binnenhei, M.; Bentz, M.; Schon, M.R. Liver resection after selective internal radiotherapy (SIRT): Proof of concept, initial survival, and safety. *J. Surg. Oncol.* **2015**, *112*, 436–442, doi:10.1002/jso.24000.
- Hadaki, M.; Praseedom, R.; Brais, R.; See, T.C.; Balan, K.; Wilson, C.B. Selective internal radiation therapy with 90Y-SIR-Spheres microspheres for non-resectable colorectal metastases in the liver. *BMJ Case Rep.* **2011**, *2011*, doi:10.1136/bcr.01.2011.3793.

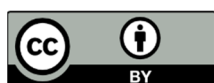

Supplement: cancers-11-01155-s001.pdf [file cancers-11-01155-s001.pdf]
